# Supplementary material
Source: PubMed Central journal article supplement (PMC6506400)

wilde type

v4

Off-T #1

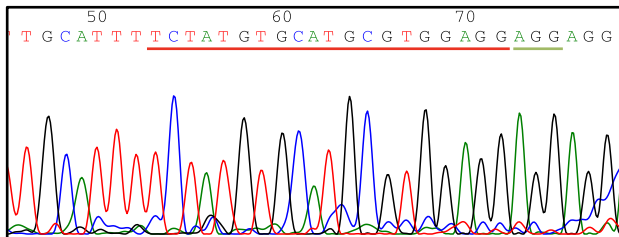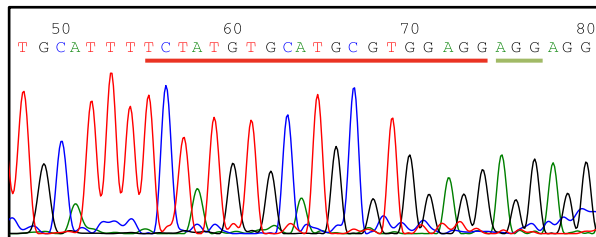

Off-T #2

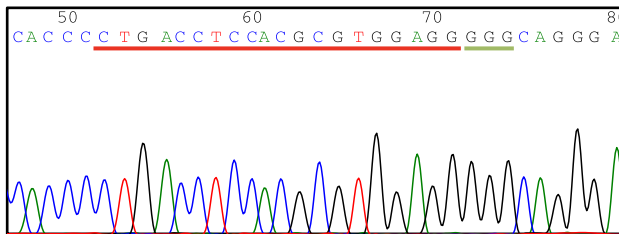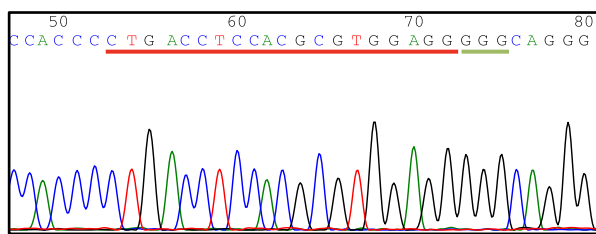

Off-T #3

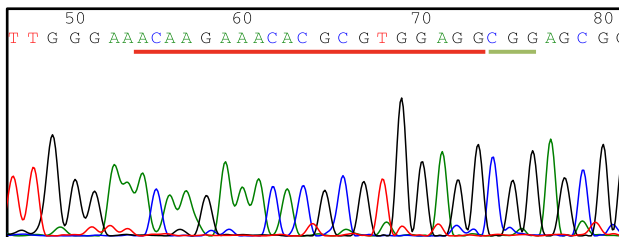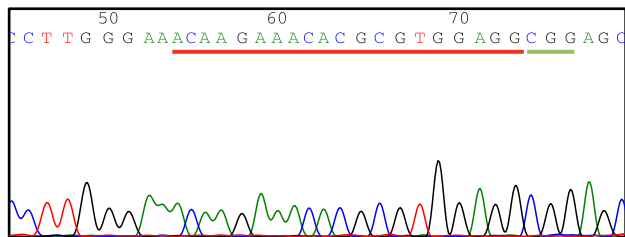

Off-T #4

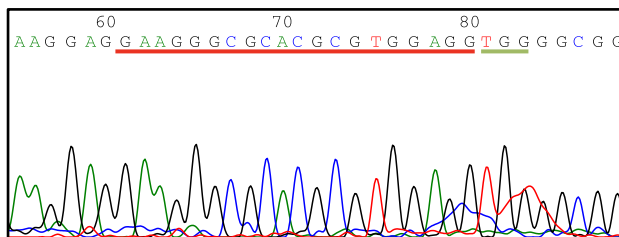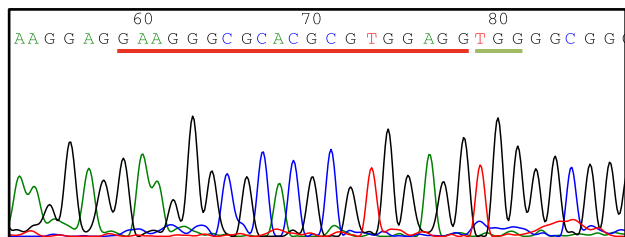

Off-T #5

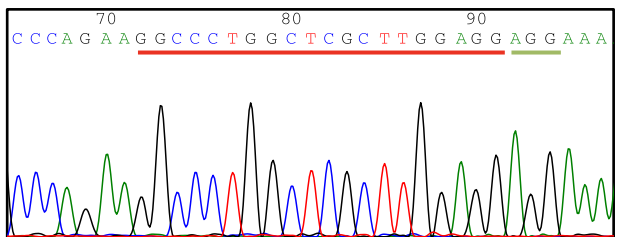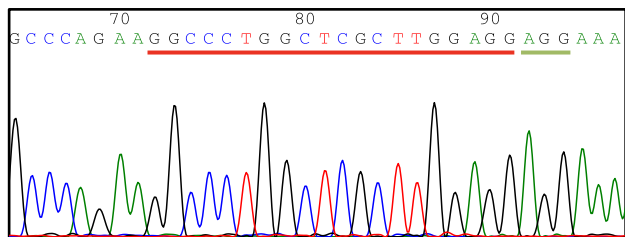

Off-T #6

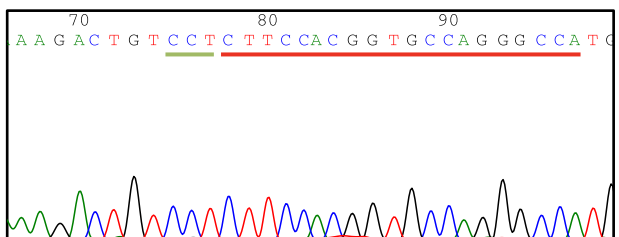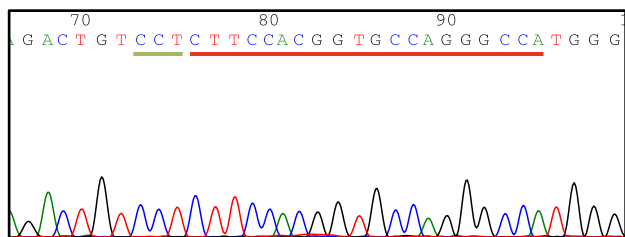

Supplement: NIHMS1512017-supplement-1.pdf [file NIHMS1512017-supplement-1.pdf]
